# Supplementary material
Source: publisher figshare collection journal article supplement (https://acs.figshare.com/ndownloader/files/4670332)
Supplement: Supplementary file 1 [file 4670332]

**Supporting Information**

**Anticancer and Antimicrobial Metallopharmaceutical Agents Based on Palladium, Gold and Silver N-Heterocyclic Carbene Complexes**

Sriparna Ray,† Renu Mohan, Jay K. Singh, Manoja K. Samantaray,† Mobin M. Shaikh,§ Dulal Panda,* and Prasenjit Ghosh†,*

†Department of Chemistry and

 School of Biosciences and Bioengineering and

§National Single Crystal X-ray Diffraction Facility,

Indian Institute of Technology Bombay,

Powai, Mumbai 400 076.

Email: [pghosh@chem.iitb.ac.in](mailto:pghosh@chem.iitb.ac.in), [panda@iitb.ac.in](mailto:panda@iitb.ac.in)

Fax: +91-22-2572-3480

**Figure S1.** ORTEP of **1a**. Selected bond lengths (Å) and angles (o): Pd1-C1 1.955(2), Pd1-N3 2.1098(19), Pd1-Cl 2.3114(6), C1-Pd1-N3 178.21(8), C1-Pd1-Cl2 87.07(7).

**Figure S2.** ORTEP of **1b**. Selected bond lengths (Å) and angles (o): Pd1-C1 2.044(4), Pd1-Cl1 2.3268(10), C1-Pd1-Cl1 87.43(10), C1-Pd1-C1#1 180.00(12), Cl1#1-Pd1-Cl1 180.0.

**Figure S3.** ORTEP of **1c**. Selected bond lengths (Å) and angles (o): Au1-C1 1.984(6), Au1-Cl1 2.2768(15), C1-Au1-Cl1 178.88(17).

**Figure S4.** ORTEP of **1d**. Selected bond lengths (Å) and angles (o): Ag1-C1 2.110(3), Ag1-Cl1 2.4283(8), Ag1-Cl1#1 2.7843(9), C1-Ag1-Cl1 154.40(9), C1-Ag1-Cl1#1 116.22(9), Cl1-Ag1-Cl1#1 89.18(3), Ag1-Cl1-Ag1#1 90.82(3).

| (a) |  | (b) |  |
| --- | --- | --- | --- |

**Figure S5.** Cell lysate of untreated (A) and **1b** (20 µM) treated cells (B) were probed with monoclonal anti-cdc2 antibody [Figure S1(a)] or polyclonal anti-phospho-cdc2 antibody [Figure S1(b)]. Complete phosphorylation of cdc2 was observed in the presence of 20 µM **1b** [B in Figure S1(b)]. This was further confirmed by the absence of unphosphorylated cdc2 detected by monoclonal antibody against cdc2 [B in Figure S1(a)], which does not recognize phosphorylated cdc2.

**Table S1. X-ray crystallographic data for 1a, 1b, 1c and 1d.**

| **Compound** | **1a** | **1b** | **1c** | **1d** |
| --- | --- | --- | --- | --- |
| lattice | Monoclinic | Monoclinic | Monoclinic | Monoclinic |
| formula | C19H23Cl2N3Pd | C14H18ClN2Pd0.50 | C14H18AuClN2 | C14H18AgClN2 |
| formula weight | 470.70 | 302.95 | 446.72 | 357.62 |
| Space group | P21/c | P21/c | P21/c | P21/c |
| a/Å | 13.3056(3) | 10.2107(6) | 11.7040(6) | 8.7190(2) |
| b/Å | 9.878(3) | 13.9758(6) | 9.6398(4) | 12.1235(3) |
| c/Å | 11.720(3) | 10.6444(6) | 14.8049(7) | 13.4064(3) |
| /° | 90.00 | 90.00 | 90.00 | 90.00 |
| /° | 104.898(2) | 115.070(7) | 113.2830(10) | 91.957(2) |
| /° | 90.00 | 90.00 | 90.00 | 90.00 |
| V/Å3 | 2025.33(9) | 1375.88(13) | 1534.32(12) | 1416.29(6) |
| Z | 4 | 4 | 4 | 4 |
| temperature (K) | 150(2) | 293(2) | 293(2) | 150(2) |
| radiation (, Å) | 0.71073 | 0.71073 | 0.71073 | 0.71073 |
| ρ(calcd.), g cm-3 | 1.544 | 1.463 | 1.934 | 1.677 |
| (Mo Kα), mm-1 | 1.187 | 0.892 | 9.747 | 1.596 |
| θ, deg. | 3.09-25.00 | 3.60-25.00 | 3.00-30.00 | 3.04-25.00 |
| No. of data | 3563 | 2424 | 4203 | 2501 |
| No. of parameters | 229 | 163 | 167 | 166 |
| R1 | 0.0277 | 0.0575 | 0.0639 | 0.0435 |
| *w*R2 | 0.0590 | 0.1279 | 0.0951 | 0.1126 |
| GOF | 1.055 | 0.999 | 0.943 | 1.047 |

The density functional theory calculations were performed on the four transition metal complexes of N-heterocyclic carbenes, namely, *trans*-[1-benzyl-3-*t*-butylimidazol-2-ylidene]Pd(pyridine)Cl2 **1a** and [1-benzyl-3-*t*-butylimidazol-2-ylidene]2PdCl2 **1b**,[1-benzyl-3-*t*-butylimidazol-2-ylidene]AuCl **1c**, and [1-benzyl-3-*t*-butylimidazol-2-ylidene]AgCl **1d** using GAUSSIAN 0364 suite of quantum chemical programs.

Output Coordinates for Mulliken and Natural Charge Analysis of **1a**, **1b**, **1c** and **1d**:

**Table S2.** Standard Orientation of **1a**

| N | 0.937436 | 2.405304 | -0.016157 |
| --- | --- | --- | --- |
| N | 1.822499 | 0.571715 | -0.765615 |
| C | 0.663865 | 1.101238 | -0.299522 |
| C | 2.827965 | 1.52238 | -0.767366 |
| H | 3.830937 | 1.295619 | -1.092157 |
| C | 2.279566 | 2.665101 | -0.2947 |
| H | 2.728363 | 3.629824 | -0.136901 |
| C | 0.043784 | 3.42596 | 0.640783 |
| C | -1.430849 | 3.166985 | 0.303096 |
| H | -1.594998 | 3.125782 | -0.777349 |
| H | -2.026383 | 3.986232 | 0.720906 |
| H | -1.791517 | 2.233134 | 0.741641 |
| C | 0.418639 | 4.82221 | 0.10613 |
| H | 1.410751 | 5.151319 | 0.43119 |
| H | -0.299688 | 5.549426 | 0.496146 |
| H | 0.375591 | 4.854197 | -0.987703 |
| C | 0.274477 | 3.348058 | 2.160833 |
| H | 0.019699 | 2.353197 | 2.537618 |
| H | -0.351438 | 4.090135 | 2.669291 |
| H | 1.321134 | 3.557478 | 2.410086 |
| C | 1.997832 | -0.805579 | -1.256074 |
| H | 2.159283 | -0.762583 | -2.33825 |
| H | 1.042643 | -1.308231 | -1.087367 |
| C | 3.137487 | -1.528084 | -0.568525 |
| C | 4.244989 | -1.96339 | -1.304469 |
| H | 4.287083 | -1.774297 | -2.375227 |
| C | 5.291589 | -2.645323 | -0.677738 |
| H | 6.145129 | -2.980112 | -1.261275 |
| C | 5.237828 | -2.892238 | 0.694024 |
| H | 6.050596 | -3.421106 | 1.184875 |
| C | 4.133628 | -2.459619 | 1.435327 |
| H | 4.085271 | -2.654428 | 2.503397 |
| C | 3.086873 | -1.782975 | 0.81068 |
| H | 2.225962 | -1.45113 | 1.387296 |
| C | -2.85105 | -2.224532 | 0.904459 |
| H | -1.97574 | -2.369531 | 1.526683 |
| C | -3.979687 | -3.030759 | 1.023664 |
| H | -3.979284 | -3.845813 | 1.740143 |
| C | -5.088626 | -2.766999 | 0.221522 |
| H | -5.985279 | -3.376039 | 0.295983 |
| C | -5.021401 | -1.704995 | -0.678774 |
| H | -5.855885 | -1.457557 | -1.32689 |
| C | -3.852845 | -0.951861 | -0.750724 |
| H | -3.738891 | -0.138122 | -1.457314 |
| N | -2.783586 | -1.201979 | 0.029997 |
| Pd | -0.998159 | 0.0157 | -0.127117 |
| Cl | -1.41428 | 0.48306 | -2.409908 |
| Cl | -0.379062 | -0.43649 | 2.121038 |

**Table S3.** Standard Orientation of **1b**

| N | -1.23051 | 2.932145 | 0.156345 |
| --- | --- | --- | --- |
| N | -2.561491 | 1.360481 | 0.813269 |
| C | -1.311362 | 1.576402 | 0.323683 |
| C | -3.260666 | 2.546403 | 0.951878 |
| H | -4.276973 | 2.578552 | 1.311307 |
| C | -2.428755 | 3.531011 | 0.541211 |
| H | -2.595681 | 4.591944 | 0.492562 |
| C | -0.045875 | 3.698478 | -0.373411 |
| C | 1.177377 | 3.414227 | 0.511753 |
| H | 2.040975 | 3.96718 | 0.125422 |
| H | 1.421183 | 2.351634 | 0.536175 |
| H | 0.994323 | 3.73065 | 1.543912 |
| C | 0.204667 | 3.291418 | -1.834334 |
| H | -0.663839 | 3.531266 | -2.457492 |
| H | 0.391364 | 2.220848 | -1.931381 |
| H | 1.069616 | 3.842031 | -2.221868 |
| C | -0.343964 | 5.206942 | -0.324323 |
| H | -1.186588 | 5.485952 | -0.966103 |
| H | 0.537451 | 5.739017 | -0.694364 |
| H | -0.536464 | 5.557875 | 0.695382 |
| C | -3.112376 | 0.053974 | 1.197968 |
| H | -3.277658 | 0.058975 | 2.28096 |
| H | -2.325613 | -0.674374 | 0.990673 |
| C | -4.394838 | -0.285326 | 0.465504 |
| C | -4.401512 | -0.422198 | -0.931374 |
| H | -3.480017 | -0.277041 | -1.491458 |
| C | -5.583324 | -0.747988 | -1.595825 |
| H | -5.578226 | -0.854153 | -2.677405 |
| C | -6.767835 | -0.942757 | -0.87847 |
| H | -7.686292 | -1.197369 | -1.400897 |
| C | -6.766422 | -0.81081 | 0.510181 |
| H | -7.682423 | -0.961261 | 1.075484 |
| C | -5.583414 | -0.481518 | 1.177405 |
| H | -5.58391 | -0.381016 | 2.261009 |
| C | 1.311359 | -1.57638 | -0.323691 |
| N | 1.230501 | -2.932135 | -0.15645 |
| N | 2.56148 | -1.360428 | -0.813279 |
| C | 3.260662 | -2.546338 | -0.951951 |
| H | 4.276964 | -2.578464 | -1.311398 |
| C | 2.428778 | -3.530966 | -0.541278 |
| H | 2.595719 | -4.591897 | -0.49266 |
| C | 0.045902 | -3.698505 | 0.37333 |
| C | -1.177442 | -3.414139 | -0.511667 |
| H | -2.040999 | -3.967142 | -0.125313 |
| H | -1.421252 | -2.351544 | -0.535918 |
| H | -0.994501 | -3.730414 | -1.543889 |
| C | -0.204481 | -3.291591 | 1.834322 |
| H | 0.664096 | -3.531494 | 2.45736 |
| H | -0.39118 | -2.221029 | 1.931487 |
| H | -1.069382 | -3.84225 | 2.2219 |
| C | 0.343954 | -5.206968 | 0.324037 |
| H | 1.186602 | -5.486084 | 0.965742 |
| H | -0.537456 | -5.73907 | 0.694052 |
| H | 0.536399 | -5.557773 | -0.695722 |
| C | 3.112353 | -0.053892 | -1.197899 |
| H | 3.277615 | -0.058817 | -2.280896 |
| H | 2.325592 | 0.674438 | -0.990536 |
| C | 4.394829 | 0.28536 | -0.465438 |
| C | 4.401521 | 0.422162 | 0.931447 |
| H | 3.480029 | 0.276988 | 1.491533 |
| C | 5.583343 | 0.747905 | 1.595902 |
| H | 5.578259 | 0.854016 | 2.677487 |
| C | 6.767849 | 0.942694 | 0.878543 |
| H | 7.686315 | 1.197267 | 1.400972 |
| C | 6.766418 | 0.810818 | -0.510115 |
| H | 7.682414 | 0.961287 | -1.07542 |
| C | 5.583399 | 0.481575 | -1.177343 |
| H | 5.58388 | 0.381132 | -2.260952 |
| Pd | -0.000009 | 0.000004 | 0.000008 |
| Cl | 0.762545 | 0.202792 | 2.246683 |
| Cl | -0.762584 | -0.202818 | -2.246658 |

**Table S4.** Standard Orientation of **1c**

| Au | 1.23791 | -0.9963 | -0.0708 |
| --- | --- | --- | --- |
| Cl | 2.3706 | -2.9556 | 0.17982 |
| N | 0.64092 | 1.9851 | -0.0507 |
| N | -1.085 | 0.79324 | -0.5831 |
| C | 0.231 | 0.70351 | -0.2563 |
| C | -1.4887 | 2.09843 | -0.5747 |
| H | -2.3425 | 2.41475 | -0.7628 |
| C | -0.42 | 2.83915 | -0.2446 |
| H | -0.3983 | 3.76563 | -0.1628 |
| C | 2.04823 | 2.38364 | 0.26345 |
| C | 2.95373 | 1.95868 | -0.8845 |
| H | 2.9317 | 1.00299 | -0.9731 |
| H | 3.85152 | 2.24422 | -0.7061 |
| H | 2.64697 | 2.36211 | -1.6999 |
| C | 2.4999 | 1.74547 | 1.56039 |
| H | 1.87875 | 1.96543 | 2.25903 |
| H | 3.37228 | 2.07547 | 1.79168 |
| H | 2.53695 | 0.79258 | 1.45155 |
| C | 2.12219 | 3.90711 | 0.42277 |
| H | 1.92728 | 4.32758 | -0.4195 |
| H | 3.00478 | 4.15704 | 0.70442 |
| H | 1.48326 | 4.19368 | 1.07885 |
| C | -1.9238 | -0.3239 | -1.0036 |
| H | -1.4811 | -1.158 | -0.7808 |
| H | -2.0351 | -0.2946 | -1.9671 |
| C | -3.2812 | -0.2899 | -0.3458 |
| C | -4.425 | -0.0881 | -1.0953 |
| H | -4.3564 | 0.02431 | -2.0162 |
| C | -5.6607 | -0.0518 | -0.4985 |
| H | -6.419 | 0.06869 | -1.0241 |
| C | -5.7973 | -0.1867 | 0.8453 |
| H | -6.6346 | -0.1269 | 1.24578 |
| C | -4.6778 | -0.4133 | 1.6015 |
| H | -4.7637 | -0.5288 | 2.5212 |
| C | -3.4315 | -0.4732 | 1.02288 |
| H | -2.6836 | -0.6354 | 1.55123 |

**Table S5.** Standard Orientation of **1d**

| Ag | 1.32391 | -1.3293 | -0.3351 |
| --- | --- | --- | --- |
| Cl | 2.84253 | -2.9596 | 0.63258 |
| N | -0.8889 | 0.7614 | -0.934 |
| N | 0.82252 | 1.7745 | -0.1426 |
| C | 0.345 | 0.53604 | -0.4297 |
| C | -1.1792 | 2.09914 | -0.9751 |
| H | -1.9663 | 2.48338 | -1.2869 |
| C | -0.111 | 2.75335 | -0.4802 |
| H | -0.0164 | 3.67275 | -0.3839 |
| C | -1.8561 | -0.2703 | -1.3079 |
| H | -1.4292 | -1.14 | -1.2627 |
| H | -2.1413 | -0.1258 | -2.2235 |
| C | -3.0715 | -0.2615 | -0.3972 |
| C | -4.3199 | -0.5738 | -0.9105 |
| H | -4.4145 | -0.7669 | -1.815 |
| C | -5.4312 | -0.5967 | -0.0703 |
| H | -6.2672 | -0.814 | -0.4146 |
| C | -5.2931 | -0.2974 | 1.27007 |
| H | -6.0385 | -0.3121 | 1.82779 |
| C | -4.0556 | 0.02142 | 1.7845 |
| H | -3.9612 | 0.22658 | 2.68624 |
| C | -2.9516 | 0.03398 | 0.94543 |
| H | -2.116 | 0.24459 | 1.29368 |
| C | 2.19578 | 2.05745 | 0.38084 |
| C | 3.20541 | 1.66061 | -0.6862 |
| H | 3.12873 | 0.72111 | -0.8666 |
| H | 4.09161 | 1.85589 | -0.3736 |
| H | 3.03244 | 2.15604 | -1.4885 |
| C | 2.43278 | 1.27841 | 1.67268 |
| H | 1.79866 | 1.5594 | 2.33588 |
| H | 3.32312 | 1.44911 | 1.9893 |
| H | 2.3268 | 0.33989 | 1.5048 |
| C | 2.33563 | 3.54572 | 0.67151 |
| H | 2.19134 | 4.04379 | -0.1347 |
| H | 3.2174 | 3.72382 | 1.00618 |
| H | 1.68547 | 3.80459 | 1.32989 |

**Table S6.** Mulliken charge and Natural charge analysis data of **1a** and **1b** complexes.

| Compound | Mulliken Charge | | Natural Charge | |
| --- | --- | --- | --- | --- |
| Ccarb | Pd | Ccarb | Pd |
|  | 0.43 | -0.19 | 0.31 | 0.57 |
| **1a** |  |  |  |  |
|  | 0.43  0.43 | -0.58 | 0.23  0.23 | 0.49 |
| **1b** |  |  |  |  |

**Table S7.** Mulliken charge and Natural charge analysis data of **1c** and **1d** complexes.

| Compound | Mulliken Charge | | Natural Charge | |
| --- | --- | --- | --- | --- |
| Ccarb | Au | Ccarb | Au |
|  | 0.25 | -0.17 | 0.11 | 0.35 |
| **1c** |  |  |  |  |
| Compound | Mulliken Charge | | Natural Charge | |
|  | Ccarb | Ag | Ccarb | Ag |
|  | 0.27 | -0.05 | 0.05 | 0.54 |
| **1d** |  |  |  |  |

**REFERENCES**

Complete Reference 64. Gaussian 03, Revision C.02, Frisch, M. J.; Trucks, G. W.; Schlegel, H. B.; Scuseria, G. E.; Robb, M. A.; Cheeseman, J. R.; Montgomery, Jr., J. A.; Vreven, T.; Kudin, K. N.; Burant, J. C.; Millam, J. M.; Iyengar, S. S.; Tomasi, J.; Barone, V.; Mennucci, B.; Cossi, M.; Scalmani, G.; Rega, N.; Petersson, G. A.; Nakatsuji, H.; Hada, M.; Ehara, M.; Toyota, K.; Fukuda, R.; Hasegawa, J.; Ishida, M.; Nakajima, T.; Honda, Y.; Kitao, O.; Nakai, H.; Klene, M.; Li, X.; Knox, J. E.; Hratchian, H. P.; Cross, J. B.; Bakken, V.; Adamo, C.; Jaramillo, J.; Gomperts, R.; Stratmann, R. E.; Yazyev, O.; Austin, A. J.; Cammi, R.; Pomelli, C.; Ochterski, J. W.; Ayala, P. Y.; Morokuma, K.; Voth, G. A.; Salvador, P.; Dannenberg, J. J.; Zakrzewski, V. G.; Dapprich, S.; Daniels, A. D.; Strain, M. C.; Farkas, O.; Malick, D. K.; Rabuck, A. D.; Raghavachari, K.; Foresman, J. B.; Ortiz, J. V.; Cui, Q.; Baboul, A. G.; Clifford, S.; Cioslowski, J.; Stefanov, B. B.; Liu, G.; Liashenko, A.; Piskorz, P.; Komaromi, I.; Martin, R. L.; Fox, D. J.; Keith, T.; Al-Laham, M. A.; Peng, C. Y.; Nanayakkara, A.; Challacombe, M.; Gill, P. M. W.; Johnson, B.; Chen, W.; Wong, M. W.; Gonzalez, C.; and Pople, J. A.; Gaussian, Inc., Wallingford CT, 2004.
